# Supplementary material
Source: PubMed Central journal article supplement (PMC2665883)

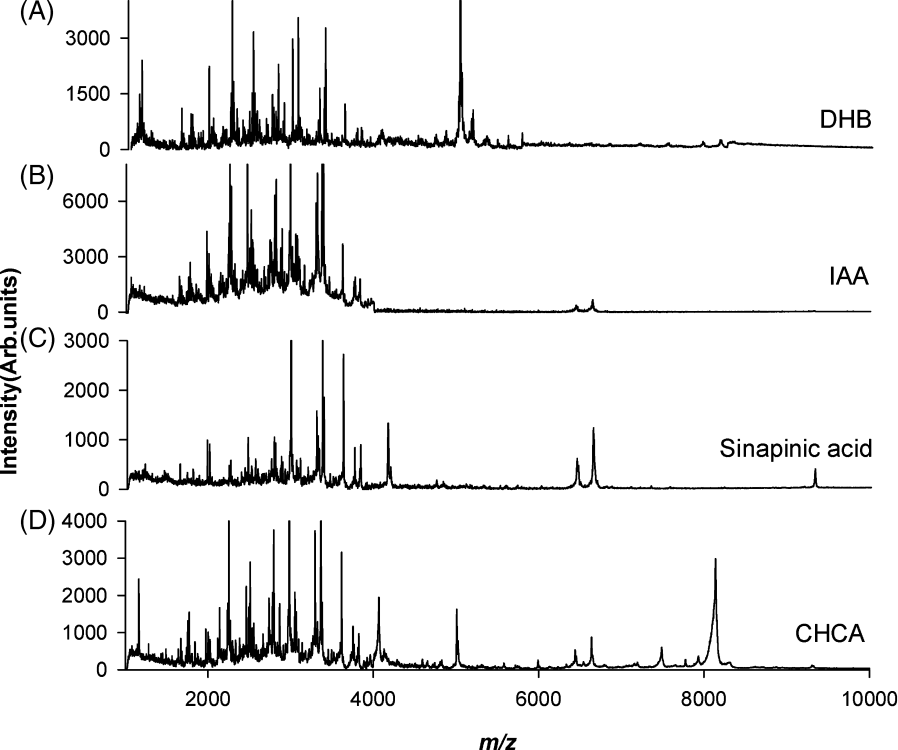

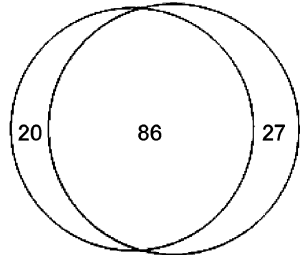

A. C18 (left circle) and C8 (right circle)

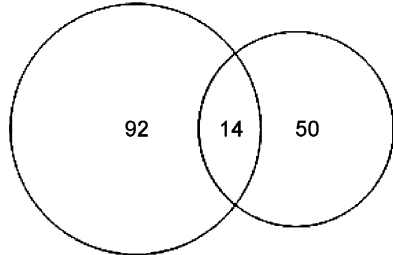

B. C18 and C4

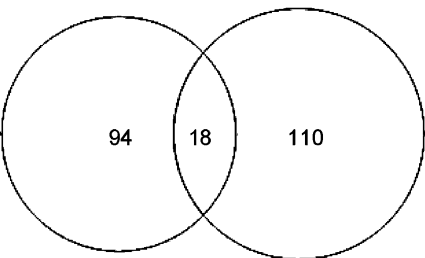

C. WCX and SAX

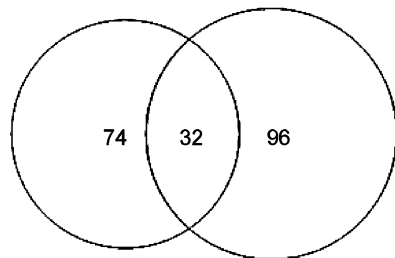

D. C18 and SAX

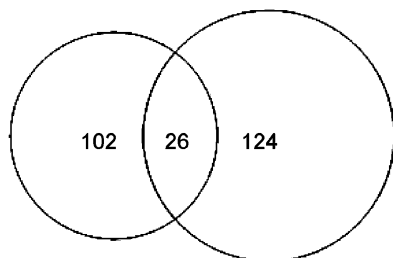

E. SAX and ZrO<sub>2</sub>

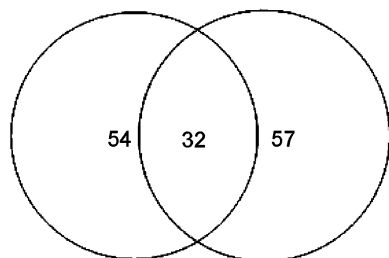

F. IMAC-Ga and IMAC-Ni

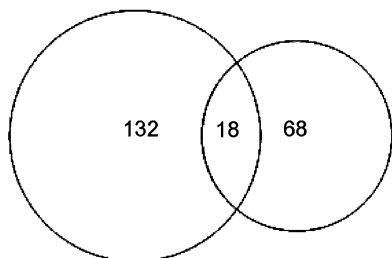

G. ZrO<sub>2</sub> and IMAC-Ga

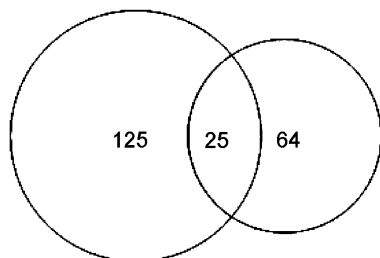

H. ZrO<sub>2</sub> and IMAC-Ni

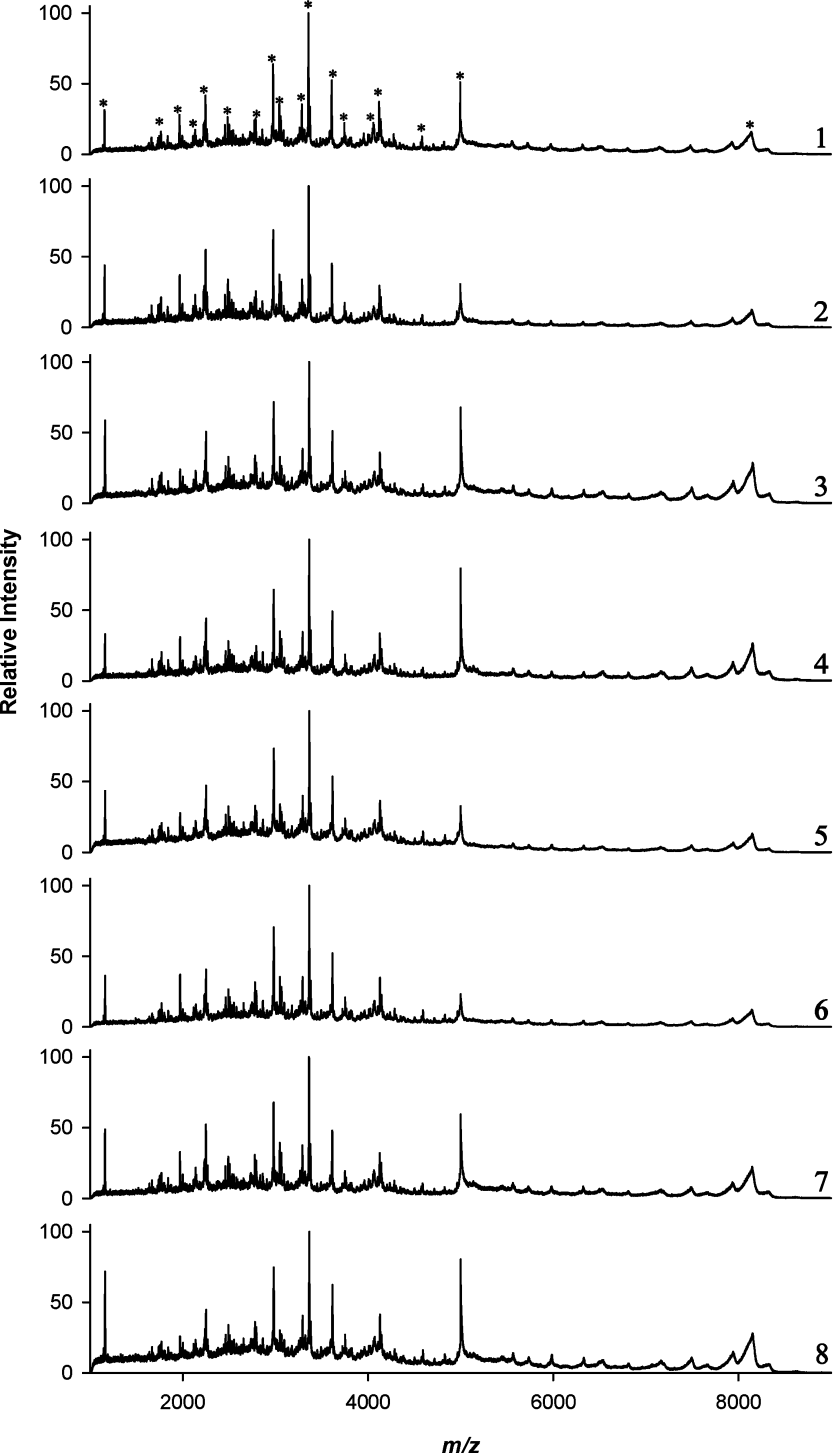

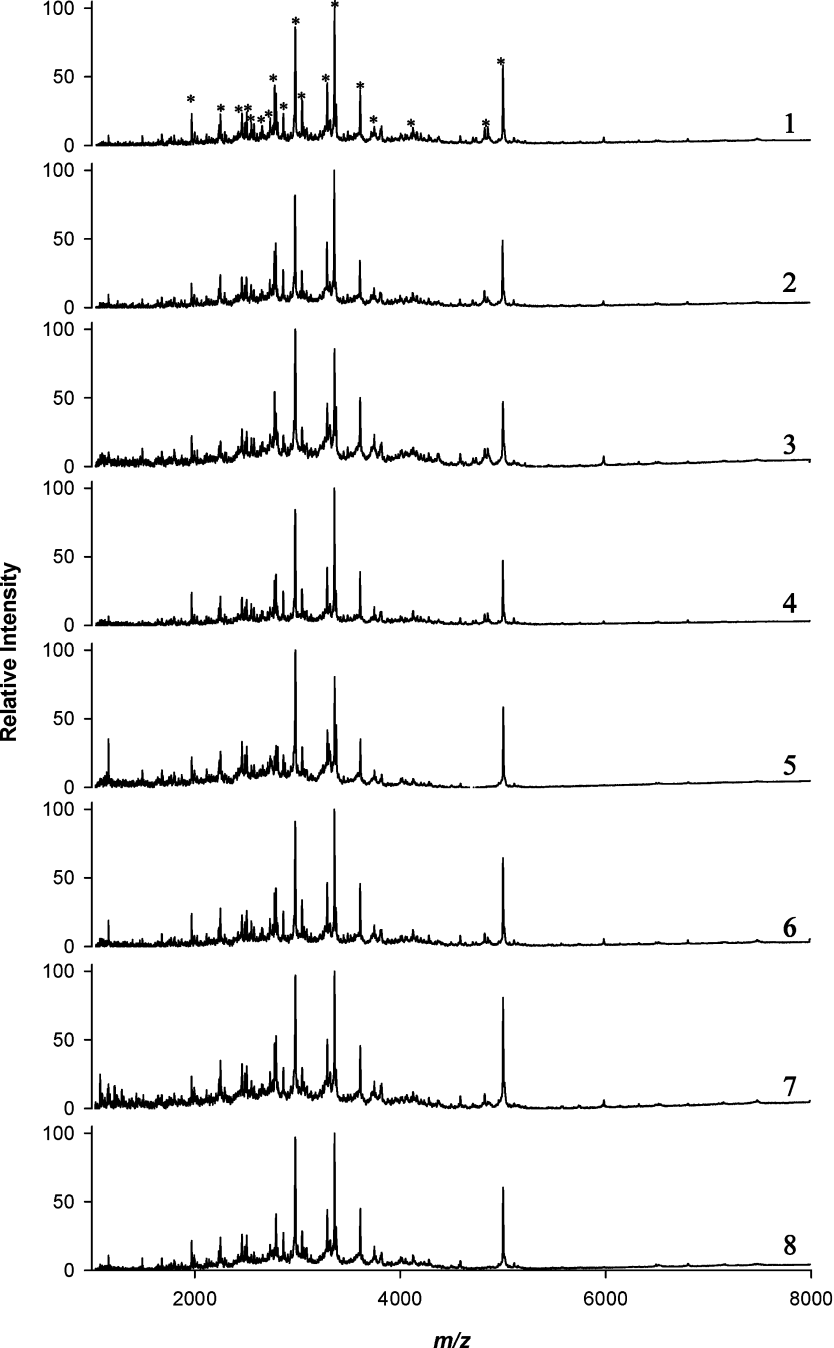

Supplement: NIHMS93604-supplement-Suplem_data.pdf [file NIHMS93604-supplement-Suplem_data.pdf]
